# Supplementary material
Source: PubMed Central journal article supplement (PMC3079605)

## Supplementary Figures

Fig. 1. **Examples of genotyping for (A) wild type and (B)  $BK\alpha^{-/-}$  knockout alleles.** Samples 99 & 104 are from a heterozygote (band in WT and KO); 100, 101 and 105 from a WT homozygote (band in WT only); and 102 & 103 from a  $BK\alpha^{-/-}$  knockout (band in KO only).

Fig. 2. **Representative traces of BK channel activity from whole-cell patch-clamp recordings of freshly isolated aortic smooth muscle cells from (A) wild type mouse and an absence of voltage-activated BK currents in (B)  $BK\alpha^{-/-}$  mouse.**

### A. Wild Type Genotyping

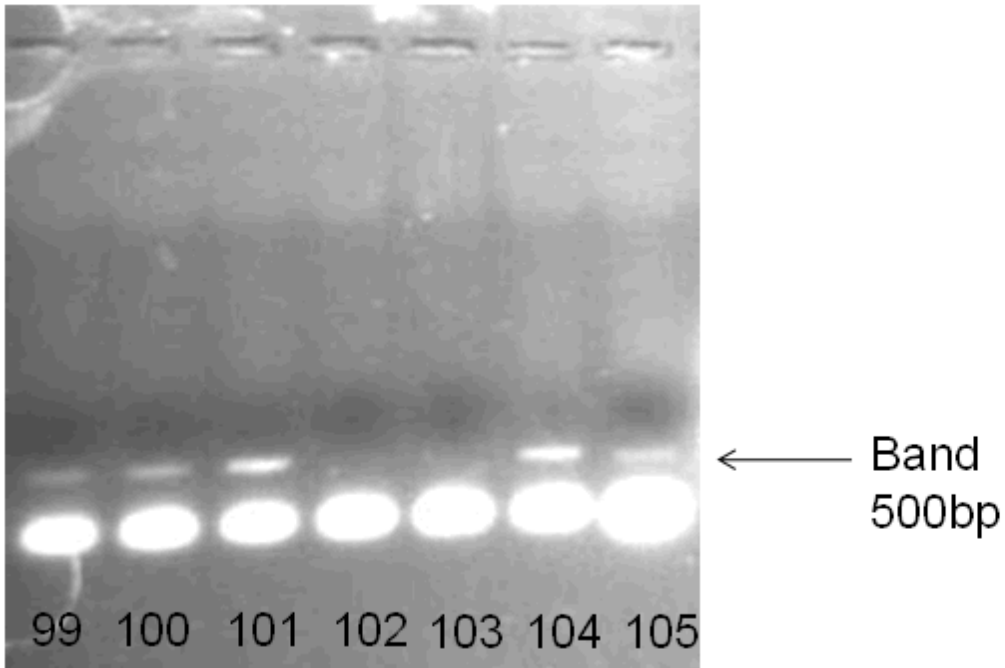

### B. Knockout Genotyping

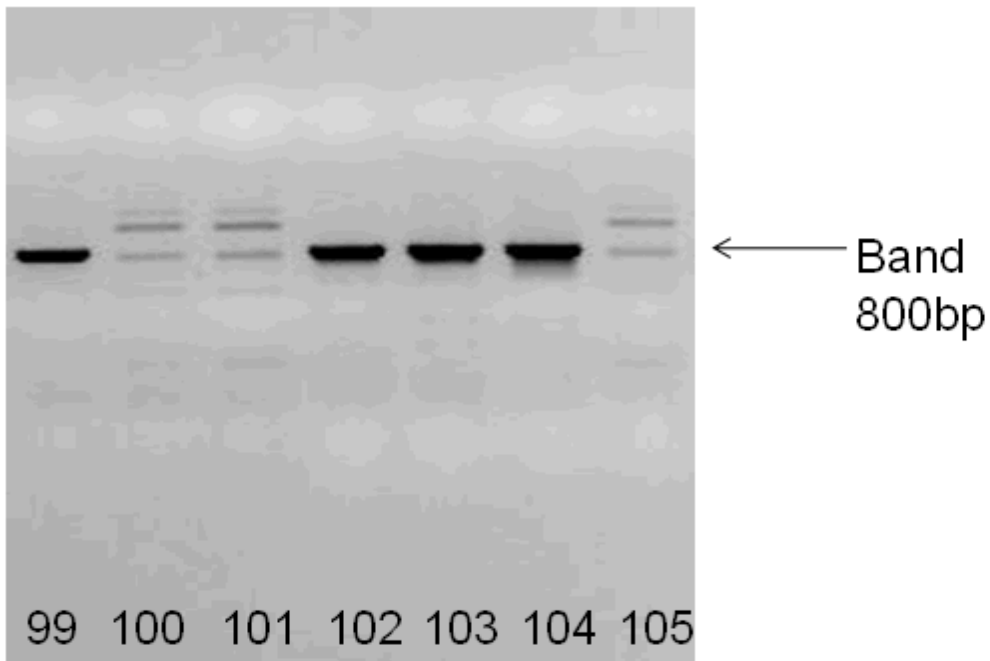

BKCa +/+

BKCa -/-

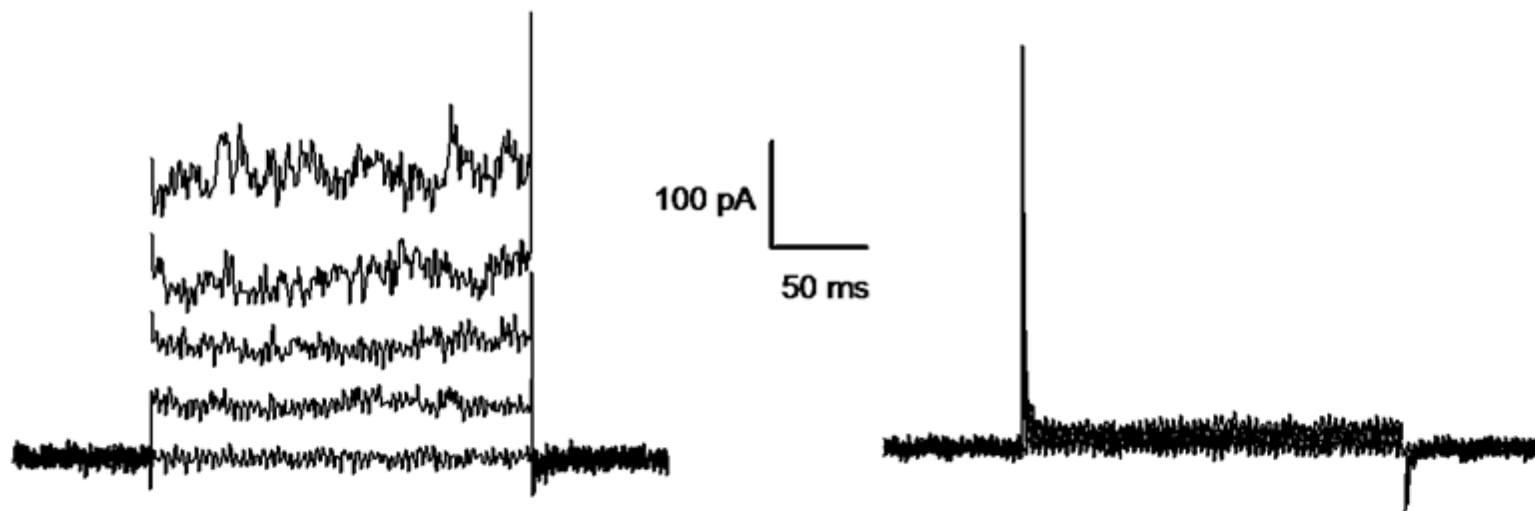

Supplement: NIHMS34688-supplement-001.pdf [file NIHMS34688-supplement-001.pdf]
